# Supplementary material for: Model-driven identification of dosing regimens that maximize the antimicrobial activity of nitric oxide
Source: PubMed Central journal article supplement — Metab Eng Commun. 2014 Sep 1;1:12–8. doi: 10.1016/j.meteno.2014.08.001 (PMC8193240; doi:10.1016/j.meteno.2014.08.001), 2014-09-01
Supplement: mmc6.pdf [file mmc6.pdf]

**Table S2. Optimized respiration parameters.** Parameters were allowed to vary between “Min.” and “Max.” values obtained or approximated from literature. “Reaction #s” are the reactions associated with each rate parameter, with numbering corresponding to that in Table S1, which is continued from the previous model [1]. “Optimal” are the optimized parameter values that best reproduce O<sub>2</sub> consumption dynamics of aerobic, exponential phase *E. coli* measured in this study.

| #  | Parameter                                     | Parameter description/reaction involved        | Reaction #s | Min.                  | Max.                  | Optimal               | Units           | Ref.                |
|----|-----------------------------------------------|------------------------------------------------|-------------|-----------------------|-----------------------|-----------------------|-----------------|---------------------|
| 1  | $k_{\text{Cyo,cat}}$                          | Cytochrome <i>bo</i> terminal oxidase          | 180         | 18.3                  | 150                   | 126                   | s <sup>-1</sup> | [2-4]               |
| 2  | $k_{\text{Cyd,cat}}$                          | Cytochrome <i>bd</i> terminal oxidase          | 181         | 12                    | 469                   | 393                   | s <sup>-1</sup> | [2,4,5]             |
| 3  | $k_{\text{NDH1,cat}}$                         | NADH dehydrogenase I                           | 182         | 50                    | 600                   | 492                   | s <sup>-1</sup> | [6,7]               |
| 4  | $k_{\text{NDH2,cat}}$                         | NADH dehydrogenase II                          | 183         | 17.1                  | 474                   | 218                   | s <sup>-1</sup> | [8,9]               |
| 5  | [Cyo] <sub>0</sub>                            | Initial concentration of cytochrome <i>bo</i>  | --          | $1.58 \times 10^{-8}$ | $1.58 \times 10^{-6}$ | $5.89 \times 10^{-7}$ | M               | [10] <sup>a</sup>   |
| 6  | [Cyd] <sub>0</sub>                            | Initial concentration of cytochrome <i>bd</i>  | --          | $1.06 \times 10^{-8}$ | $1.06 \times 10^{-6}$ | $9.54 \times 10^{-7}$ | M               | [10] <sup>a</sup>   |
| 7  | [Q <sub>8</sub> ] <sub>0</sub>                | Initial concentration of ubiquinone-8          | --          | $4.48 \times 10^{-5}$ | $4.48 \times 10^{-3}$ | $4.24 \times 10^{-3}$ | M               | [11] <sup>a,b</sup> |
| 8  | [Q <sub>8</sub> H <sub>2</sub> ] <sub>0</sub> | Initial concentration of ubiquinol-8           | --          | $4.48 \times 10^{-5}$ | $4.48 \times 10^{-3}$ | $9.26 \times 10^{-5}$ | M               | [11] <sup>a,b</sup> |
| 9  | [NDH1] <sub>0</sub>                           | Initial concentration of NADH dehydrogenase I  | --          | $2.70 \times 10^{-8}$ | $2.70 \times 10^{-6}$ | $1.87 \times 10^{-6}$ | M               | [12] <sup>a</sup>   |
| 10 | [NDH2] <sub>0</sub>                           | Initial concentration of NADH dehydrogenase II | --          | $3.05 \times 10^{-9}$ | $3.05 \times 10^{-7}$ | $2.95 \times 10^{-7}$ | M               | [13] <sup>a</sup>   |

a. Species concentrations were allowed to vary within one order of magnitude in either direction of the value calculated from literature, as the concentrations were typically reported in molecules/cell, and were converted to intracellular concentrations assuming a cell volume of  $3.2 \times 10^{-15}$  L [14].

b. The concentrations of ubiquinone-8 and ubiquinol-8 were reported to be approximately 1 μmol/g dry cell weight [11], which was converted to an intracellular concentration by assuming a cell density of 448 gDW/L [12].

## References

1. Robinson JL, Brynildsen MP: **A Kinetic Platform to Determine the Fate of Nitric Oxide in *Escherichia coli***. *PLoS Comput Biol* 2013, **9**:e1003049.
2. Mason MG, Shepherd M, Nicholls P, Dobbin PS, Dodsworth KS, Poole RK, Cooper CE: **Cytochrome bd confers nitric oxide resistance to *Escherichia coli***. *Nat Chem Biol* 2009, **5**:94-96.
3. Bolgiano B, Salmon I, Poole RK: **Reactions of the membrane-bound cytochrome bo terminal oxidase of *Escherichia coli* with carbon monoxide and oxygen**. *Biochim Biophys Acta* 1993, **1141**:95-104.
4. Rice CW, Hempfling WP: **Oxygen-limited continuous culture and respiratory energy conservation in *Escherichia coli***. *J Bacteriol* 1978, **134**:115-124.
5. Junemann S, Butterworth PJ, Wrigglesworth JM: **A suggested mechanism for the catalytic cycle of cytochrome bd terminal oxidase based on kinetic analysis**. *Biochemistry* 1995, **34**:14861-14867.
6. Verkhovskaya ML, Belevich N, Euro L, Wikstrom M, Verkhovsky MI: **Real-time electron transfer in respiratory complex I**. *Proc Natl Acad Sci U S A* 2008, **105**:3763-3767.
7. Leif H, Sled VD, Ohnishi T, Weiss H, Friedrich T: **Isolation and characterization of the proton-translocating NADH: ubiquinone oxidoreductase from *Escherichia coli***. *Eur J Biochem* 1995, **230**:538-548.
8. Jaworowski A, Campbell HD, Poulis MI, Young IG: **Genetic identification and purification of the respiratory NADH dehydrogenase of *Escherichia coli***. *Biochemistry* 1981, **20**:2041-2047.
9. Villegas JM, Volentini SI, Rintoul MR, Rapisarda VA: **Amphipathic C-terminal region of *Escherichia coli* NADH dehydrogenase-2 mediates membrane localization**. *Arch Biochem Biophys* 2011, **505**:155-159.
10. Cotter PA, Chepuri V, Gennis RB, Gunsalus RP: **Cytochrome-O (CyoABCDE) and D (CydAB) Oxidase Gene Expression in *Escherichia coli* Is Regulated by Oxygen, pH, and the Fnr Gene Product**. *J Bacteriol* 1990, **172**:6333-6338.
11. Bekker M, Kramer G, Hartog AF, Wagner MJ, de Koster CG, Hellingwerf KJ, de Mattos MJT: **Changes in the redox state and composition of the quinone pool of *Escherichia coli* during aerobic batch-culture growth**. *Microbiol* 2007, **153**:1974-1980.
12. Sundararaj S, Guo A, Habibi-Nazhad B, Rouani M, Stothard P, Ellison M, Wishart DS: **The CyberCell Database (CCDB): a comprehensive, self-updating, relational database to coordinate and facilitate in silico modeling of *Escherichia coli***. *Nucleic Acids Res* 2004, **32**:D293-D295.
13. Taniguchi Y, Choi PJ, Li GW, Chen H, Babu M, Hearn J, Emili A, Xie XS: **Quantifying *E. coli* proteome and transcriptome with single-molecule sensitivity in single cells**. *Science* 2010, **329**:533-538.
14. Volkmer B, Heinemann M: **Condition-dependent cell volume and concentration of *Escherichia coli* to facilitate data conversion for systems biology modeling**. *PLoS One* 2011, **6**:e23126.
