# Supplementary material for: Model-driven identification of dosing regimens that maximize the antimicrobial activity of nitric oxide
Source: PubMed Central journal article supplement — Metab Eng Commun. 2014 Sep 1;1:12–8. doi: 10.1016/j.meteno.2014.08.001 (PMC8193240; doi:10.1016/j.meteno.2014.08.001), 2014-09-01
Supplement: mmc7.pdf [file mmc7.pdf]

**Table S3. Measured extracellular parameters.** Parameters were measured in cell-free media in the experimental system described in the main text.

| <b>Parameter</b>   | <b>Description</b>                                  | <b>Measured Value</b> | <b>Units</b>                    |
|--------------------|-----------------------------------------------------|-----------------------|---------------------------------|
| $k_{LaO_2}$        | O <sub>2</sub> volumetric mass transfer coefficient | $1.38 \times 10^{-3}$ | s <sup>-1</sup>                 |
| $k_{LaNO\cdot}$    | NO• volumetric mass transfer coefficient            | $3.14 \times 10^{-3}$ | s <sup>-1</sup>                 |
| $k_{NO\cdot-O_2}$  | NO• autoxidation rate                               | $9.00 \times 10^5$    | M <sup>-2</sup> s <sup>-1</sup> |
| $k_{NONOate,DPTA}$ | DPTA NONOate dissociation rate                      | $8.24 \times 10^{-5}$ | s <sup>-1</sup>                 |
| $k_{NONOate,PAPA}$ | PAPA NONOate dissociation rate                      | $7.35 \times 10^{-4}$ | s <sup>-1</sup>                 |
