# Supplementary material for: Model-driven identification of dosing regimens that maximize the antimicrobial activity of nitric oxide
Source: PubMed Central journal article supplement — Metab Eng Commun. 2014 Sep 1;1:12–8. doi: 10.1016/j.meteno.2014.08.001 (PMC8193240; doi:10.1016/j.meteno.2014.08.001), 2014-09-01
Supplement: mmc8.pdf [file mmc8.pdf]

**Table S4. Optimized cellular parameters.** Parameters were allowed to vary between “Min.” and “Max.” values obtained or approximated from literature. “Reaction #s” are the reactions associated with each rate parameter, with numbering corresponding to that in the model [1]. “Optimal” are optimized parameter values, and are only shown for parameters found to significantly affect the SSR between simulated and measured [NO•] and [O<sub>2</sub>] curves for *E. coli* treated with 500 μM DPTA. “Prev. Opt.” are the optimal values for significant parameters obtained in our previous study [1]. Dashed lines (--) in the “Optimal” and “Prev. Opt.” columns indicate parameters found to have negligible effect on the SSR.

| #  | Parameter                                         | Parameter description/reaction involved                                 | Reaction #s | Min.                  | Max.                  | Optimal               | Prev. Opt.            | Units                        | Ref.         |
|----|---------------------------------------------------|-------------------------------------------------------------------------|-------------|-----------------------|-----------------------|-----------------------|-----------------------|------------------------------|--------------|
| 1  | $k_{\text{NO}\cdot\text{-[Fe-S]}}$                | [Fe-S] nitrosylation by NO•                                             | 85,86       | $1.0 \times 10^4$     | $1.0 \times 10^8$     | $9.51 \times 10^7$    | --                    | $\text{M}^{-2}\text{s}^{-1}$ | [2]          |
| 2  | $k_{\text{DNIC-rem}}$                             | DNIC removal from protein                                               | 87,89       | 1                     | 100                   | 62.7                  | --                    | $\text{M}^{-1}\text{s}^{-1}$ | [3]          |
| 3  | $k_{\text{DNIC-bind}}$                            | DNIC binding to apoprotein                                              | 88,90       | 1                     | 100                   | --                    | --                    | $\text{M}^{-1}\text{s}^{-1}$ | [3]          |
| 4  | $k_{\text{DNIC-deg}}$                             | O <sub>2</sub> -mediated DNIC degradation                               | 91          | 0.1                   | 100                   | --                    | --                    | $\text{M}^{-1}\text{s}^{-1}$ | [4]          |
| 5  | $k_{\text{IscU-load-Fe}}$                         | IscA-mediated Fe <sup>2+</sup> transfer to IscU                         | 92,93       | $2.5 \times 10^{-3}$  | 2.5                   | 0.36                  | --                    | $\text{s}^{-1}$              | [5]          |
| 6  | $K_{\text{IscU-load-S,Cys}}$                      | IscS-mediated S transfer from Cys to IscU                               | 151,152     | $1.0 \times 10^{-6}$  | $1.0 \times 10^{-4}$  | --                    | --                    | M                            | [6]          |
| 7  | $K_{\text{IscU-load-S,IscU}}$                     | IscS-mediated S transfer from Cys to IscU                               | 151,152     | $1.0 \times 10^{-6}$  | $1.0 \times 10^{-4}$  | $1.55 \times 10^{-5}$ | --                    | M                            | [6,7]        |
| 8  | $k_{\text{IscU-2Fe2S-insert,cat}}$                | IscU-mediated [2Fe-2S] insertion into apoprotein                        | 153,154     | $1.0 \times 10^{-4}$  | 0.1                   | $1.08 \times 10^{-2}$ | --                    | $\text{s}^{-1}$              | [8]          |
| 9  | $K_{\text{IscU-2Fe2S-insert,P2Fe2S(apo)}}$        | IscU-mediated [2Fe-2S] insertion into apoprotein                        | 153,154     | $1.0 \times 10^{-6}$  | $1.0 \times 10^{-4}$  | --                    | --                    | M                            | [8]          |
| 10 | $k_{\text{IscU-4Fe4S-insert}}$                    | IscU-mediated [4Fe-4S] insertion into apoprotein                        | 94          | 1                     | 500                   | 6.12                  | --                    | $\text{M}^{-1}\text{s}^{-1}$ | [9]          |
| 11 | $k_{\text{dN-deam}}$                              | N <sub>2</sub> O <sub>3</sub> -mediated DNA base deamination            | 95–97       | $1.0 \times 10^3$     | $1.0 \times 10^6$     | --                    | --                    | $\text{M}^{-1}\text{s}^{-1}$ | [10]         |
| 12 | $K_{\text{dX-excis,DNA(dX)}}$                     | Excision of xanthine from DNA                                           | 155         | $1.0 \times 10^{-8}$  | $1.0 \times 10^{-6}$  | --                    | --                    | M                            | [11]         |
| 13 | $K_{\text{dI-excis,DNA(dI)}}$                     | Excision of hypoxanthine from DNA                                       | 156         | $1.0 \times 10^{-8}$  | $1.0 \times 10^{-6}$  | --                    | --                    | M                            | [12]         |
| 14 | $K_{\text{dU-excis,DNA(dU)}}$                     | Excision of uracil from DNA                                             | 157         | $1.0 \times 10^{-8}$  | $1.0 \times 10^{-6}$  | --                    | --                    | M                            | [13]         |
| 15 | $k_{\text{Hmp,NO}\cdot\text{-on}}$                | Hmp detoxification; NO• binding to Hmp-Fe <sup>2+</sup>                 | 110,113,118 | $4.0 \times 10^6$     | $2.6 \times 10^7$     | $8.19 \times 10^6$    | $4.13 \times 10^6$    | $\text{M}^{-1}\text{s}^{-1}$ | [14]         |
| 16 | $k_{\text{Hmp,NO}\cdot\text{-ox}}$                | Hmp detoxification; NO• binding to Hmp-Fe <sup>2+</sup> -O <sub>2</sub> | 103,108,125 | $9.6 \times 10^8$     | $2.4 \times 10^9$     | --                    | --                    | $\text{M}^{-1}\text{s}^{-1}$ | [14]         |
| 17 | $k_{\text{Hmp-exp,max}}$                          | Hmp expression (maximum rate)                                           | 177         | $2.0 \times 10^{-10}$ | $2.0 \times 10^{-8}$  | $1.73 \times 10^{-8}$ | $1.93 \times 10^{-8}$ | $\text{M}\cdot\text{s}^{-1}$ | <sup>a</sup> |
| 18 | $K_{\text{Hmp-exp,NO}\cdot}$                      | Hmp expression (regulatory NO• interaction)                             | 177         | $1.0 \times 10^{-8}$  | $1.0 \times 10^{-5}$  | $1.72 \times 10^{-6}$ | $3.38 \times 10^{-7}$ | M                            | <sup>b</sup> |
| 19 | $k_{\text{NorV-exp,max}}$                         | NorV expression (maximum rate)                                          | 178         | $2.0 \times 10^{-10}$ | $2.0 \times 10^{-8}$  | --                    | --                    | $\text{M}\cdot\text{s}^{-1}$ | <sup>a</sup> |
| 20 | $K_{\text{NorV-exp,NO}\cdot}$                     | NorV expression (regulatory NO• interaction)                            | 178         | $1.0 \times 10^{-8}$  | $1.0 \times 10^{-5}$  | --                    | --                    | M                            | <sup>b</sup> |
| 21 | $k_{\text{NorV-O}_2}$                             | O <sub>2</sub> -mediated NorV inactivation                              | 146,147     | 10                    | 1000                  | 849                   | 549                   | $\text{M}^{-1}\text{s}^{-1}$ | [15]         |
| 22 | $k_{\text{NrfA-exp,max}}$                         | NrfA expression (maximum rate)                                          | 179         | $2.0 \times 10^{-10}$ | $2.0 \times 10^{-8}$  | --                    | --                    | $\text{M}\cdot\text{s}^{-1}$ | <sup>a</sup> |
| 23 | $K_{\text{NrfA-exp,NO}_2^-}$                      | NrfA expression (regulatory NO <sub>2</sub> <sup>-</sup> interaction)   | 179         | $1.0 \times 10^{-6}$  | $1.0 \times 10^{-3}$  | --                    | --                    | M                            | <sup>c</sup> |
| 24 | $K_{\text{NrfA-exp,O}_2}$                         | NrfA expression (regulatory O <sub>2</sub> interaction)                 | 179         | $1.0 \times 10^{-12}$ | $1.0 \times 10^{-10}$ | --                    | --                    | M                            | <sup>c</sup> |
| 25 | [Cys] <sub>0</sub>                                | Initial concentration of cysteine                                       | --          | $5.0 \times 10^{-5}$  | $2.0 \times 10^{-4}$  | --                    | --                    | M                            | [16,17]      |
| 26 | [Trx <sub>red</sub> ] <sub>0</sub>                | Initial concentration of reduced thioredoxin                            | --          | $5.0 \times 10^{-6}$  | $5.0 \times 10^{-5}$  | --                    | --                    | M                            | [18,19]      |
| 27 | [IscU] <sub>0</sub>                               | Initial concentration of IscU                                           | --          | $1.0 \times 10^{-8}$  | $1.0 \times 10^{-5}$  | $8.30 \times 10^{-6}$ | --                    | M                            | [6,20]       |
| 28 | [IscS] <sub>0</sub>                               | Initial concentration of IscS                                           | --          | $1.0 \times 10^{-8}$  | $1.0 \times 10^{-5}$  | $7.60 \times 10^{-6}$ | --                    | M                            | [6,20]       |
| 29 | [P <sub>2Fe2S</sub> ( <i>holo</i> )] <sub>0</sub> | Initial concentration of <i>holo</i> [2Fe-2S] proteins                  | --          | $1.0 \times 10^{-6}$  | $1.0 \times 10^{-4}$  | $8.29 \times 10^{-5}$ | --                    | M                            | [21,22]      |
| 30 | [P <sub>4Fe4S</sub> ( <i>holo</i> )] <sub>0</sub> | Initial concentration of <i>holo</i> [4Fe-4S] proteins                  | --          | $5.0 \times 10^{-5}$  | $5.0 \times 10^{-4}$  | $4.82 \times 10^{-4}$ | --                    | M                            | [21,22]      |
| 31 | [LigA] <sub>0</sub>                               | Initial concentration of DNA ligase                                     | --          | $1.0 \times 10^{-8}$  | $1.0 \times 10^{-5}$  | --                    | --                    | M                            | [23]         |
| 32 | [PolI] <sub>0</sub>                               | Initial concentration of DNA polymerase                                 | --          | $1.0 \times 10^{-8}$  | $1.0 \times 10^{-5}$  | --                    | --                    | M                            | [23]         |
| 33 | [DNA(dN)] <sub>0</sub>                            | Initial concentration of DNA bases (dA,dC,dG)                           | --          | 0.001                 | 0.1                   | --                    | --                    | M                            | [22]         |
| 34 | [Xth] <sub>0</sub>                                | Initial concentration of DNA exonuclease III                            | --          | $1.0 \times 10^{-9}$  | $1.0 \times 10^{-6}$  | --                    | --                    | M                            | [24]         |
| 35 | [GS-FDH] <sub>0</sub>                             | Initial concentration of GSH-dependent FDH                              | --          | $1.0 \times 10^{-8}$  | $1.0 \times 10^{-5}$  | --                    | --                    | M                            | [24]         |
| 36 | [AlkA] <sub>0</sub>                               | Initial concentration of DNA glycosylase (dX, dI)                       | --          | $1.0 \times 10^{-9}$  | $1.0 \times 10^{-6}$  | --                    | --                    | M                            | [24]         |
| 37 | [Ung] <sub>0</sub>                                | Initial concentration of DNA glycosylase (dU)                           | --          | $1.0 \times 10^{-9}$  | $1.0 \times 10^{-6}$  | --                    | --                    | M                            | [24]         |

<sup>a</sup>. The bounds of Hmp, NorV, and NrfA maximum expression rates were chosen based on those reported for various enzymes in [25]. Values were converted from  $\text{g}_{\text{protein}}/\text{g}_{\text{DW}}\cdot\text{s}$  to  $\text{M}\cdot\text{s}^{-1}$  assuming a cell density of 448 gDW/L [22], and ranged from  $2 \times 10^{-10}$  (Acs) to  $2 \times 10^{-8}$   $\text{M}\cdot\text{s}^{-1}$  (PfkA).

- b.* The NO• binding constant describing Hmp and NorV expression was varied in the nM to μM range based on reported physiological concentrations of NO• [26,27].
- c.* The NO<sub>2</sub><sup>-</sup> binding constant describing NrfA expression was varied in the μM range, and the O<sub>2</sub> inhibition term was assumed to be much lower, as NrfA expression is primarily anaerobic [28,29].

## References

1. Robinson JL, Brynildsen MP: **A Kinetic Platform to Determine the Fate of Nitric Oxide in *Escherichia coli***. *PLoS Comput Biol* 2013, **9**:e1003049.
2. Duan X, Yang J, Ren B, Tan G, Ding H: **Reactivity of nitric oxide with the [4Fe-4S] cluster of dihydroxyacid dehydratase from *Escherichia coli***. *Biochem J* 2009, **417**:783-789.
3. Rogers PA, Ding HG: **L-cysteine-mediated destabilization of dinitrosyl iron complexes in proteins**. *J Biol Chem* 2001, **276**:30980-30986.
4. Yang JJ, Duan XW, Landry AP, Ding HG: **Oxygen is required for the L-cysteine-mediated decomposition of protein-bound dinitrosyl-iron complexes**. *Free Radic Biol Med* 2010, **49**:268-274.
5. Layer G, Ollagnier-de Choudens S, Sanakis Y, Fontecave M: **Iron-sulfur cluster biosynthesis - Characterization of *Escherichia coli* CyaY as an iron donor for the assembly of [2Fe-2S] clusters in the scaffold IscU**. *J Biol Chem* 2006, **281**:16256-16263.
6. Urbina HD, Silberg JJ, Hoff KG, Vickery LE: **Transfer of sulfur from IscS to IscU during Fe/S cluster assembly**. *J Biol Chem* 2001, **276**:44521-44526.
7. Prisci F, Konarev PV, Iannuzzi C, Pastore C, Adinolfi S, Martin SR, Svergun DI, Pastore A: **Structural bases for the interaction of frataxin with the central components of iron-sulphur cluster assembly**. *Nat Commun* 2010, **1**:95.
8. Bonomi F, Iametti S, Ta D, Vickery LE: **Multiple Turnover Transfer of [2Fe2S] Clusters by the Iron-Sulfur Cluster Assembly Scaffold Proteins IscU and IscA**. *J Biol Chem* 2005, **280**:29513-29518.
9. Unciuleac MC, Chandramouli K, Naik S, Mayer S, Huynh BH, Johnson MK, Dean DR: **In Vitro Activation of Apo-Aconitase Using a [4Fe-4S] Cluster-Loaded Form of the IscU [Fe-S] Cluster Scaffolding Protein**. *Biochemistry* 2007, **46**:6812-6821.
10. Dong M, Wang C, Deen WM, Dedon PC: **Absence of 2'-deoxyoxanosine and presence of abasic sites in DNA exposed to nitric oxide at controlled physiological concentrations**. *Chem Res Toxicol* 2003, **16**:1044-1055.
11. Terato H, Masaoka A, Asagoshi K, Honsho A, Ohyama Y, Suzuki T, Yamada M, Makino K, Yamamoto K, Ide H: **Novel repair activities of AlkA (3-methyladenine DNA glycosylase II) and endonuclease VIII for xanthine and oxanine, guanine lesions induced by nitric oxide and nitrous acid**. *Nucleic Acids Res* 2002, **30**:4975-4984.
12. Zhao BY, O'Brien PJ: **Kinetic Mechanism for the Excision of Hypoxanthine by *Escherichia coli* AlkA and Evidence for Binding to DNA Ends**. *Biochemistry* 2011, **50**:4350-4359.
13. Wong I, Lundquist AJ, Bernards AS, Mosbaugh DW: **Presteady-state Analysis of a Single Catalytic Turnover by *Escherichia coli* Uracil-DNA Glycosylase Reveals a "Pinch-Pull-Push" Mechanism**. *J Biol Chem* 2002, **277**:19424-19432.
14. Gardner AM, Martin LA, Gardner PR, Dou Y, Olson JS: **Steady-state and transient kinetics of *Escherichia coli* nitric-oxide dioxygenase (flavo-hemoglobin) - The B10 tyrosine hydroxyl is essential for dioxygen binding and catalysis**. *J Biol Chem* 2000, **275**:12581-12589.
15. Gardner AM, Gardner PR: **Flavo-hemoglobin detoxifies nitric oxide in aerobic, but not anaerobic, *Escherichia coli*. Evidence for a novel inducible anaerobic nitric oxide-scavenging activity**. *J Biol Chem* 2002, **277**:8166-8171.

16. Wheldrake JF: **Intracellular concentration of cysteine in *Escherichia coli* and its relation to repression of the sulphate-activating enzymes.** *Biochem J* 1967, **105**:697-699.
17. Park S, Imlay JA: **High levels of intracellular cysteine promote oxidative DNA damage by driving the fenton reaction.** *J Bacteriol* 2003, **185**:1942-1950.
18. Sengupta R, Ryter SW, Zuckerbraun BS, Tzeng E, Billiar TR, Stoyanovsky DA: **Thioredoxin catalyzes the denitrosation of low-molecular mass and protein S-nitrosothiols.** *Biochemistry* 2007, **46**:8472-8483.
19. Lillig CH, Prior A, Schwenn JD, Aslund F, Ritz D, Vlamis-Gardikas A, Holmgren A: **New thioredoxins and glutaredoxins as electron donors of 3'-phosphoadenylylsulfate reductase.** *J Biol Chem* 1999, **274**:7695-7698.
20. Maynard ND, Macklin DN, Kirkegaard K, Covert MW: **Competing pathways control host resistance to virus via tRNA modification and programmed ribosomal frameshifting.** *Mol Syst Biol* 2012, **8**.
21. Fontecave M: **Iron-sulfur clusters: ever-expanding roles.** *Nat Chem Biol* 2006, **2**:171-174.
22. Sundararaj S, Guo A, Habibi-Nazhad B, Rouani M, Stothard P, Ellison M, Wishart DS: **The CyberCell Database (CCDB): a comprehensive, self-updating, relational database to coordinate and facilitate in silico modeling of *Escherichia coli*.** *Nucleic Acids Res* 2004, **32**:D293-D295.
23. Lehman IR: **DNA Ligase - Structure, Mechanism, and Function.** *Science* 1974, **186**:790-797.
24. Taniguchi Y, Choi PJ, Li GW, Chen H, Babu M, Hearn J, Emili A, Xie XS: **Quantifying *E. coli* proteome and transcriptome with single-molecule sensitivity in single cells.** *Science* 2010, **329**:533-538.
25. Kotte O, Zaugg JB, Heinemann M: **Bacterial adaptation through distributed sensing of metabolic fluxes.** *Mol Syst Biol* 2010, **6**.
26. Allen BW, Liu J, Piantadosi CA: **Electrochemical detection of nitric oxide in biological fluids.** *Methods Enzymol* 2005, **396**:68-77.
27. Wang C, Trudel LJ, Wogan GN, Deen WM: **Thresholds of nitric oxide-mediated toxicity in human lymphoblastoid cells.** *Chem Res Toxicol* 2003, **16**:1004-1013.
28. Browning DF, Lee DJ, Spiro S, Busby SJ: **Down-regulation of the *Escherichia coli* K-12 *nrf* promoter by binding of the NsrR nitric oxide-sensing transcription repressor to an upstream site.** *J Bacteriol* 2010, **192**:3824-3828.
29. Spiro S: **Nitric oxide-sensing mechanisms in *Escherichia coli*.** *Biochem Soc Trans* 2006, **34**:200-202.
